# Supplementary material for: Mesothelioma-Associated Fibroblasts Modulate the Response of Mesothelioma Patient-Derived Organoids to Chemotherapy via Interleukin-6
Source: MDPI journal article supplement (doi:10.3390/ijms25105355), 2024-05-14
Supplement: s1 [file s1]

**Suppl. Figure S1.** Graph representing the effect of MAF-CM on the average max diameter of the mPDO#2,3,4 at each passage (0–4). Please note that passage 0 refers to 5 days after seeding.

**Suppl. Figure S2. The CM from chemotherapy treated MAFs increased the expression of stem cell markers.** Representative heat maps of the expression levels of the indicated mRNAs, as assessed by qRT-PCR, at the indicated time, after addition of the MAF-CM. Values expressed as fold over ctrl (n-CM treated mPDO#2,3,4). The average of two independent experiments is reported. Statistics.

**Suppl. Figure S3.** Kaplan-Meier plot of 84 MPM assessed for the levels of FGF9 mRNA. Kaplan Meier analysis was performed with the Xena platform [42].
